# Supplementary material for: HB-GAM (pleiotrophin) reverses inhibition of neural regeneration by the CNS extracellular matrix
Source: PubMed Central journal article supplement (PMC5037378; doi:10.1038/srep33916), 2016-09-27
Supplement: srep33916-s1.pdf [file srep33916-s1.pdf]

Supplementary information for the manuscript

**HB-GAM (pleiotrophin) reverses inhibition of neural regeneration by the CNS extracellular matrix**

Authors: Mikhail Paveliev<sup>1</sup>, Keith K. Fenrich<sup>2,3</sup>, Mikhail Kislin<sup>1</sup>, Juha Kuja-Panula<sup>1</sup>, Evgeny Kuleskiy<sup>1</sup>, Markku Varjosalo<sup>4</sup>, Tommi Kajander<sup>4</sup>, Ekaterina Mugantseva<sup>1</sup>, Anni Ahonen-Bishopp<sup>1</sup>, Leonard Khiroug<sup>1</sup>, Natalia Kuleskaya<sup>1</sup>, Geneviève Rougon<sup>2</sup> & Heikki Rauvala<sup>1\*</sup>

Affiliation: <sup>1</sup> Neuroscience Center, University of Helsinki, Finland, <sup>2</sup> Neuroscience Institute Marseille, France, <sup>3</sup> Neuroscience and Mental Health Institute, Faculty of Rehabilitation Medicine, University of Alberta, Edmonton, Canada, <sup>4</sup> Institute of Biotechnology, University of Helsinki, Finland

\*Correspondence: Heikki Rauvala, Address: Neuroscience Center, P.O.Box 56, FIN-00014, University of Helsinki, Finland; telephone: +358 50 3605790; fax: +358 9 191 57620; e-mail: heikki.rauvala@helsinki.fi

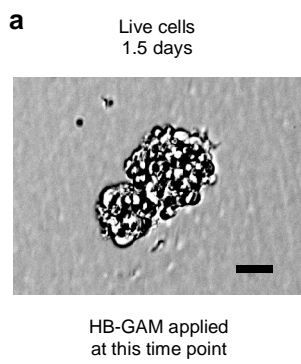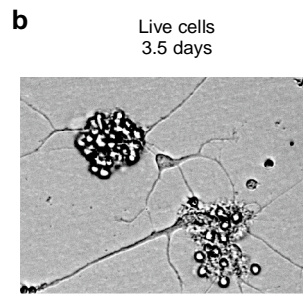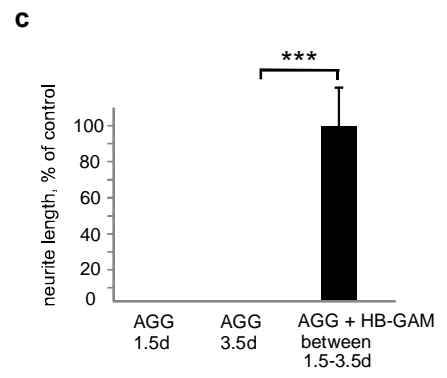

**a**

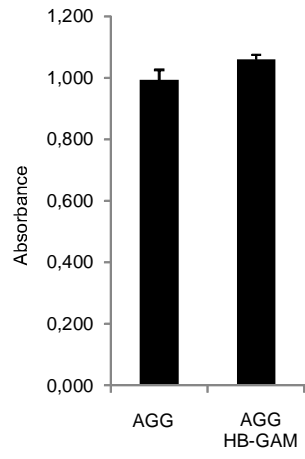

**b**

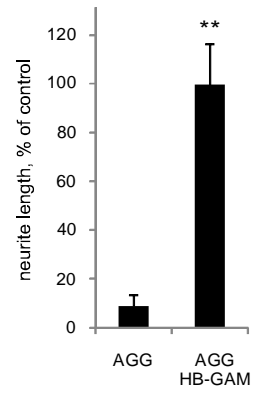

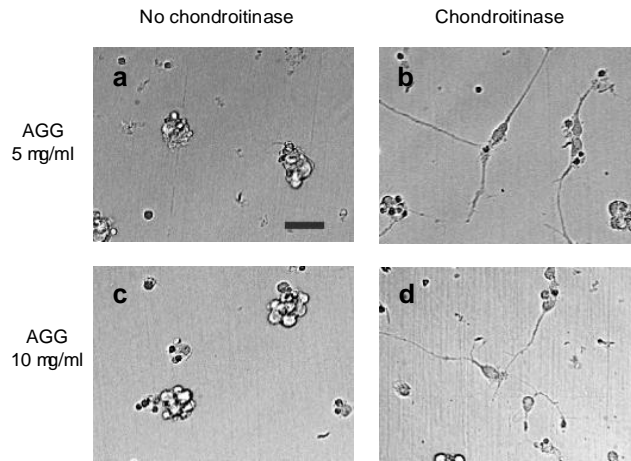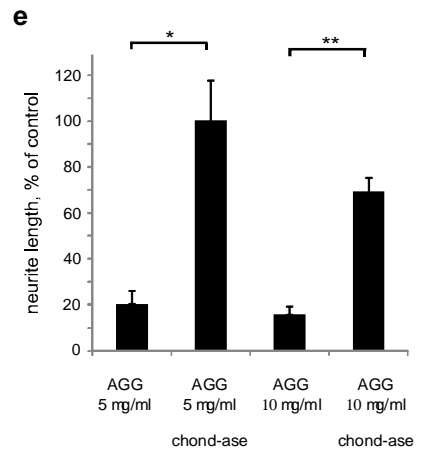

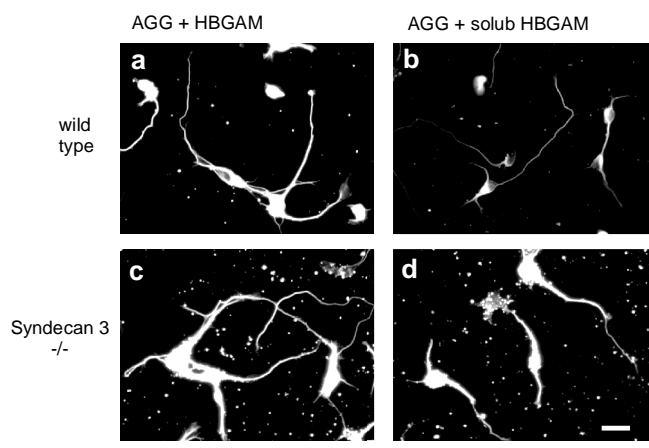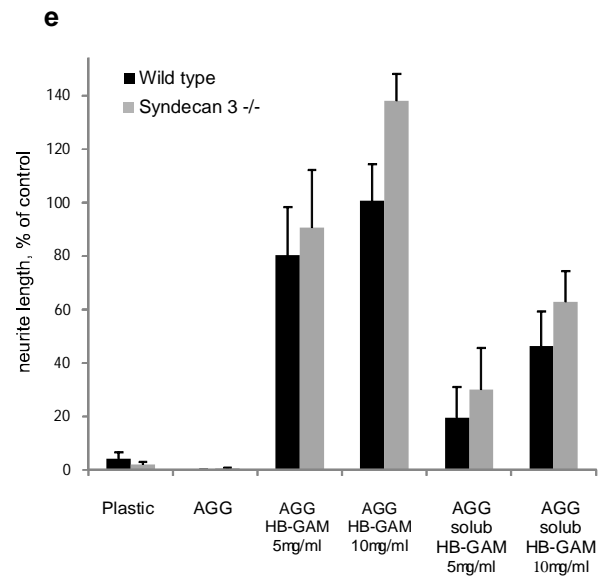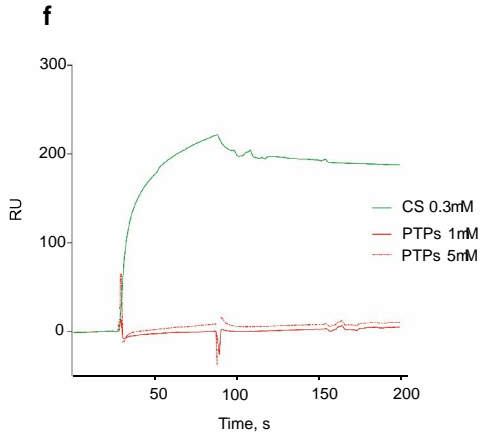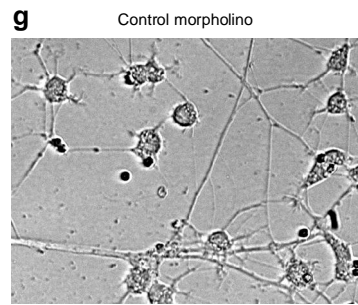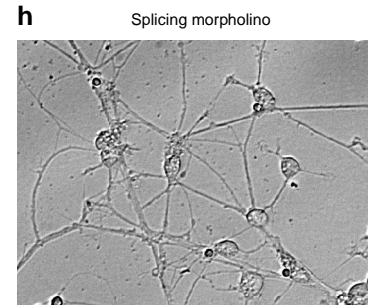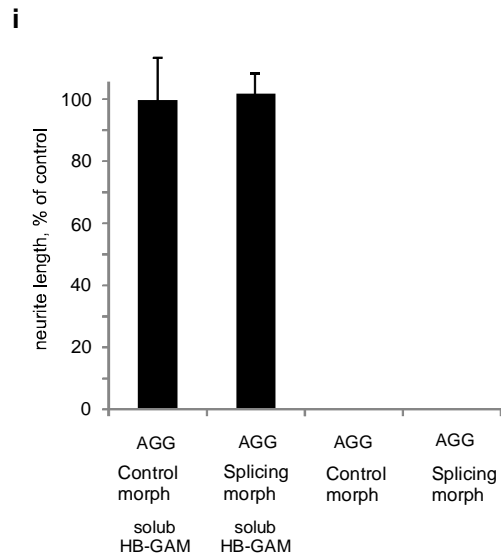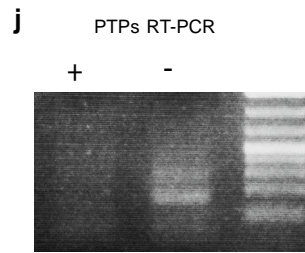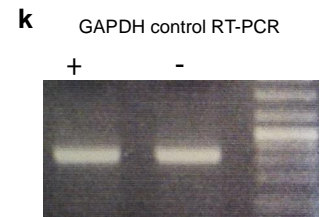

Paveliev et al., Figure S4

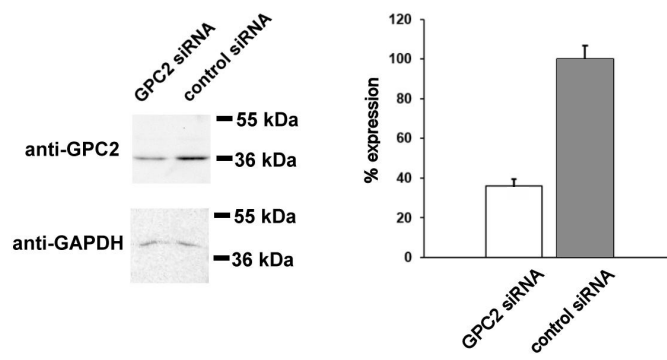

Paveliev et al., Figure S5

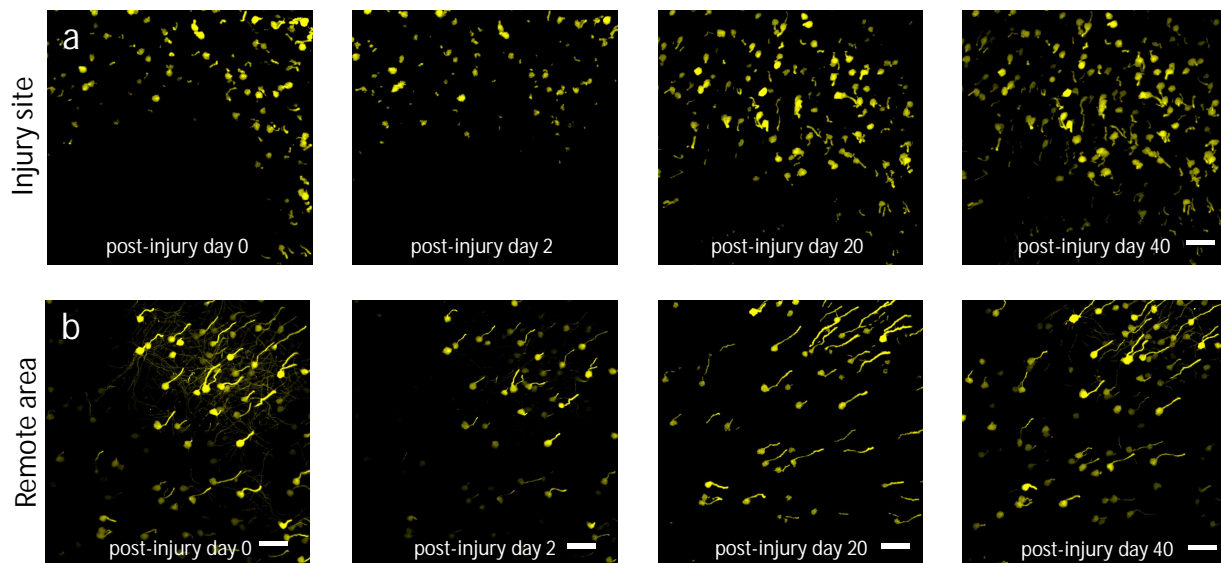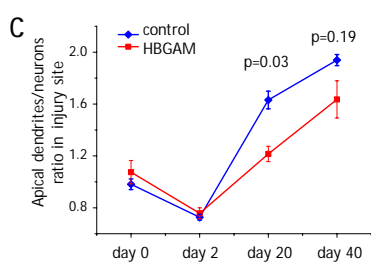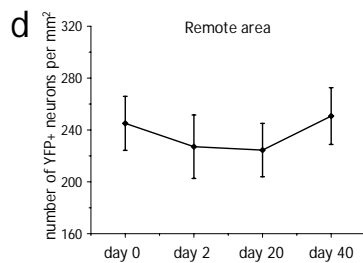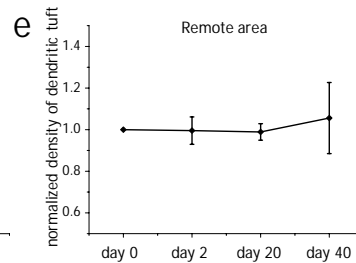

Paveliev et al., Figure S6

Supplementary figure legends

**Supplementary Figure 1. Delayed application of HB-GAM overcomes neurite outgrowth inhibition in cortical neurons cultured on a CSPG-rich matrix.** (a-c) Cortical neurons from E17 rats cultured on substrate precoated with aggrecan (10  $\mu\text{g/ml}$ ). HB-GAM (10  $\mu\text{g/ml}$ ) was added to culture medium 1.5 days after plating, and the cells were cultured for 2 additional days. One way ANOVA was used in c. The scale bar in a is 20  $\mu\text{m}$ .

**Supplementary Figure 2. HB-GAM does not reduce the amount of coated aggrecan on the substrate. HB-GAM promotes neurite outgrowth in cortical neurons on aggrecan immobilized through biotin-avidin interaction.** (a) Binding of biotinylated aggrecan to cell culture plastic was measured by colorimetric assay using streptavidin-conjugated HRP after coating in the presence versus absence of HB-GAM (10  $\mu\text{g/ml}$ ). (b) Biotinylated aggrecan (5  $\mu\text{g/ml}$ ) was immobilized on neutravidin plates. Soluble HB-GAM (20  $\mu\text{g/ml}$ ) was added when plating neurons.

**Supplementary Figure 3. Chondroitinase ABC digestion of the substrate-bound aggrecan decreases its inhibitory effect on neurite outgrowth.** (a, c and e) Cortical neurons cultured on the substrate coated with aggrecan at 5  $\mu\text{g/ml}$  or at 10  $\mu\text{g/ml}$  exhibited little or no neurite growth. (b, d and e) In parallel cultures, the aggrecan-coated substrate was treated with chondroitinase ABC (2 U/ml, 30 min) followed by single wash with PBS. In the chondroitinase ABC-treated samples neurons extended significantly longer neurites compared to the untreated samples. All washing steps were applied equally to the chondroitinase-treated and -untreated samples. The scale bar in a (25  $\mu\text{m}$ ) is valid for a-d.



**Supplementary Figure 4. The HB-GAM receptor syndecan-3 or the CSPG receptor PTP $\sigma$  are not required for neurite growth on CSPG in the presence of HB-GAM.** (a-e) Neurite outgrowth in cortical neurons prepared from P1-P2 syndecan-3  $+/+$  and  $-/-$  mouse littermates. Neurons were cultured on the substrate precoated with aggrecan or with aggrecan + HB-GAM (10  $\mu\text{g/ml}$  each) for 2 days, then fixed and immunostained for tubulin  $\beta$  III. Neurons from syndecan-3  $+/+$  and  $-/-$  mice extend neurites on aggrecan + HB-GAM as shown in **a**, **b** and **e** but not on tissue culture plastic or on the culture plastic coated only with aggrecan as shown in **c**. Soluble HB-GAM induces outgrowth in neurons from both syndecan-3  $+/+$  and  $-/-$  mice on the aggrecan-coated substrate as shown in **c**, **d** and **e**. The scale bar in **d** is 20  $\mu\text{m}$ . (f) Surface plasmon resonance was used to test whether the ectodomain of PTP $\sigma$  (the N-terminal extracellular part that contains three Ig domains, as in Figure 3) interacts directly with HB-GAM. HB-GAM was immobilized on the surface and 1  $\mu\text{M}$  and 5  $\mu\text{M}$  PTP $\sigma$  (red lines) was injected over it and compared to 0.3  $\mu\text{M}$  shark cartilage CS (green line). All ligands were injected for 60 s. (g-i) Neurite outgrowth in E17 cortical neurons cultured for 3 days with the control vivo-morpholino in **g** and **i**, or with the vivo-morpholino inhibiting splicing of PTP $\sigma$  in **h** and **i** (4  $\mu\text{g/ml}$  each). The cells were cultured on aggrecan (2  $\mu\text{g/ml}$ ) for 3 days, then replated on aggrecan (2  $\mu\text{g/ml}$ ) with or without HB-GAM (10  $\mu\text{g/ml}$ ) in the culture medium and cultured for additional 3 days. (j and k) Knockdown of the PTP $\sigma$  mRNA in the neurons is demonstrated by RT-PCR analysis. Neuronal cultures were treated (+) or not treated (-) with the vivo-morpholino inhibiting splicing of PTP $\sigma$ .

**Supplementary Figure 5. Efficiency of glypican-2 siRNAs in reducing the proteoglycan expression.** Hippocampal neurons treated with glypican-2 siRNAs and with negative control siRNA were treated with heparinase III to cleave the HS chains in order to facilitate western blotting analysis of the proteoglycan.

Western blotting with anti-glypican-2 antibodies revealed 65% reduction in expression when the cells were treated with the glypican-2 siRNAs. For loading control purposes the same samples were blotted with antibodies against the housekeeping protein GAPDH.

**Supplementary Figure 6. HB-GAM improves dendrite regeneration in injury site after prick-injury *in vivo*.** The maximum projection (top view) of YFP-labelled layer 5 pyramidal neurons somas (yellow) in injury site (**a**) and remote area (**b**) 3 hours and 2, 20,40 days after injury. **c.** Average ratio of the numbers of apical dendrites per neuron in injury site over time in control experiments (blue line) and following HB-GAM treatment (red line) (p-value from Mann-Whitney-U test). Error bars, SEM (n = 4 control; n = 4 HB-GAM). Number of YFP+ neurons per mm<sup>2</sup> over time in remote area (**d**) and average density of dendritic tufts normalized to the time point of 3h following the injury (**e**) across control and HB-GAM treated animal remain unchanged over time.

Supplementary video legends

**Video 1. HB-GAM improves dendrite regeneration in injury site after prick-injury *in vivo*.** *In vivo* two-photon microscopy revealed robust regeneration of the dendritic tuft and of apical dendrites compared to the start of the experiment (3 h from the acute injury) within 2-3 weeks in the perilesional area in HB-GAM-injected cortical injury sites compared to the controls (Fig. 6c-j; optical sections included in the merged image stacks shown in Video 1).

**Video 2. Through-depth videos of spinal cord injury sites immediately following injury from an IgG treated animal (left video) and an HB-GAM treated animal (right video).** Each video shows a merged through-depth image stack (c.f., Figures 7E (IgG) and 7H (HB-GAM)) and the individual optical frames used to generate each through-depth image stack. Each frame represents an optical section, with Frame 1 showing the most ventral (i.e., deepest) optical section and the last Frame showing the most dorsal (i.e., most superficial) optical section. Caudal is up, Rostral is down.

**Video 3. Through-depth videos of spinal cord injury sites 14 days after injury from an IgG treated animal (left video) and an HB-GAM treated animal (right video).** Each video shows a merged through-depth image stack (c.f., Figures 7E (IgG) and 7H (HB-GAM)) and the individual optical frames used to generate each through-depth image stack. Each frame represents an optical section, with Frame 1 showing the most ventral (i.e., deepest) optical section and the last Frame showing the most dorsal (i.e., most superficial) optical section. Caudal is up, Rostral is down.

**Video 4. Through-depth videos of spinal cord injury sites at 28 days after injury from an IgG treated animal (left video) and an HB-GAM treated animal (right video).** Each video shows a merged through-depth image stack (c.f., Figures 7F (IgG) and 7I (HB-GAM)) and the individual optical frames used to generate each through-depth image stack. Each frame represents an optical section, with Frame 1 showing the most ventral (i.e., deepest) optical section and the last Frame showing the most dorsal (i.e., most superficial) optical section. Caudal is up, Rostral is down.
